# Supplementary material for: Approaching the limit of CuII/CuI mixed valency in a CuIBr2–N-methylquinoxalinium hybrid compound
Source: Royal Society of Chemistry journal article supplement (doi:10.1039/c5cc04142b), 2015-01-01
Supplement: c5cc04142b1.pdf [file c5cc04142b1.pdf]

# Approaching the limit of Cu<sup>II</sup>/Cu<sup>I</sup> mixed valency in a Cu<sup>I</sup>Br<sub>2</sub>-N-methylquinoxalinium hybrid compound

Nicolas Leblanc<sup>\*a</sup>, Stephen Sproules<sup>c</sup>, Claude Pasquier<sup>\*d</sup>, Pascale Auban-Senzier<sup>d</sup>, Helene Raffy<sup>d</sup>, and Annie K. Powell<sup>\*a,b</sup>

## Supporting Information

### A - Synthesis

(MQ)[CuBr<sub>2</sub>]<sub>∞</sub> salt is obtained according to the following steps :

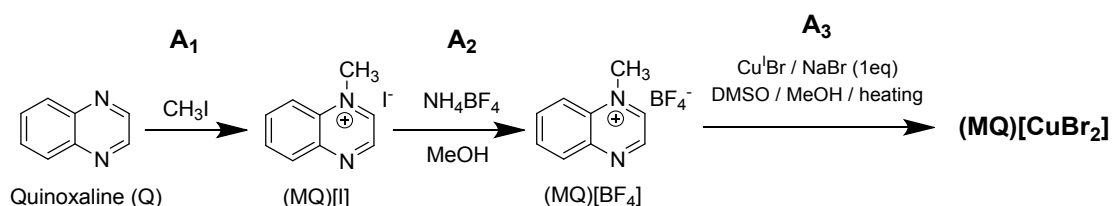

#### A<sub>1</sub>-(MQ)[I]

Quinoxaline (5 mL, 4.32 10<sup>-2</sup> mol) and methyl iodide (4 mL, 6.42 10<sup>-2</sup> mol) are mixed with 10 mL of DCM and the solution is left standing 3 weeks after sealing. The orange-red crystals formed are filtered, washed with Et<sub>2</sub>O and dried under vacuum to afford 9.263 g (79%) of the title compound.

<sup>1</sup>H NMR (500 MHz, DMSO-d<sub>6</sub>): δ = 9.73 (d, J = 2.8 Hz, 1H), 9.67 (d, J = 2.8 Hz, 1H), 8.64 (d, J = 8.5 Hz, 1H), 8.54 (dd, J = 8.4, 1.3 Hz, 1H), 8.37 (ddd, J = 8.7, 7.1, 1.5 Hz, 1H), 8.31 (ddd, J = 8.3, 7.1, 1.2 Hz, 1H), 4.73 (s, 3H).

#### A<sub>2</sub>-(MQ)[BF<sub>4</sub>]

(MQ)[I] (2.721 g, 10<sup>-2</sup> mol) and NH<sub>4</sub>BF<sub>4</sub> (5.242 g, 5 10<sup>-2</sup> mol) are added into 150 mL of MeOH. The mixture is heated up to the boiling point and subsequently filtered through a paper filter. The red filtrate is then stored overnight in the freezer at -20°C. The mixture of crystals formed is collected in a filter paper and dried. To separate the residual NH<sub>4</sub>BF<sub>4</sub> salt, (MQ)[BF<sub>4</sub>] crystals are dissolved with 10 mL of ACN giving a red solution. Et<sub>2</sub>O (100 mL) is then added resulting of a crystalline yellow precipitate. The precipitate is repeatedly recrystallized from MeOH at -20°C, giving 1.034 g (44 %) of the title compound as white flakes.

$^1\text{H}$  NMR (500 MHz, DMSO- $d_6$ ):  $\delta$  = 9.57 (d,  $J$  = 2.1 Hz, 1H), 9.10 (d,  $J$  = 2.6 Hz, 1H), 8.55 (dd,  $J$  = 8.5, 1.4 Hz, 1H), 8.47 (d,  $J$  = 8.6, 1H), 8.36 (ddd,  $J$  = 8.8, 7.1, 1.5 Hz, 1H), 8.31 (ddd,  $J$  = 8.2, 7.1, 1.2 Hz, 1H), 4.69 (s, 3H).

**XRPD of (MQ)[BF<sub>4</sub>]: theoretical (red) and experimental (blue)**

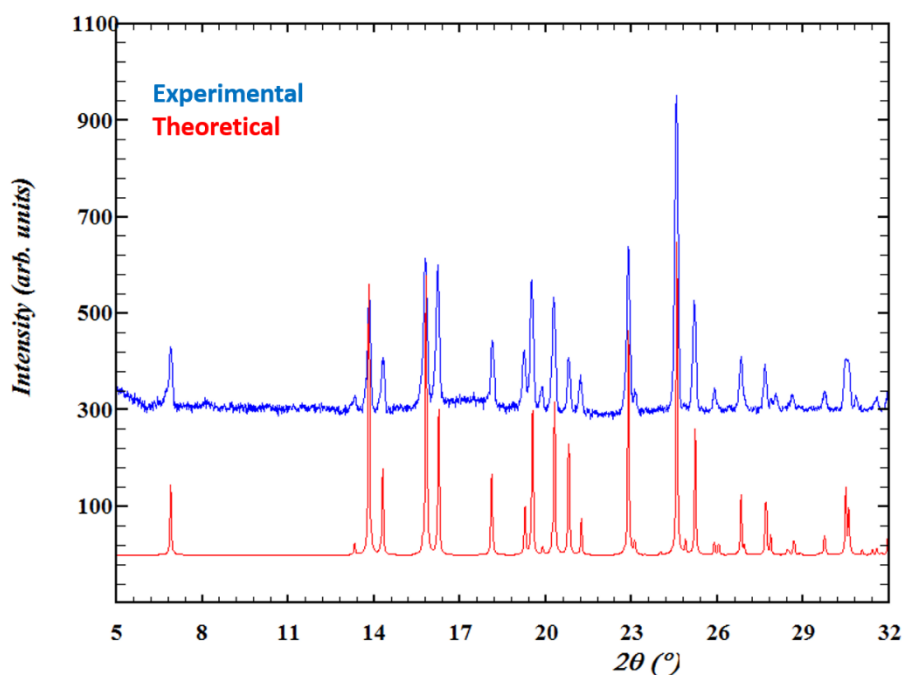

**A<sub>3</sub>-(MQ)[CuBr<sub>2</sub>]<sub>∞</sub>**

Under aerobic conditions, in a pillbox is mixed a stoichiometric ( $2 \cdot 10^{-3}$  mol) amount of  $\text{Cu}^{\text{I}}\text{Br}$  (143 mg), NaBr (106 mg) and (MQ)[BF<sub>4</sub>] (232 mg) in 2.5 mL of DMSO. The compounds are completely dissolved under slightly heating, leading to a brown solution. After cooling to room temperature, the pillbox is covered with an aluminium foil pierced with 4 “syringes” holes and then inserted in a bigger one filled with MeOH for liquid/gas diffusion. After few hours dark brown crystals of the title compound were formed in a pure phase (257 mg, 35%).

**XRPD of (MQ)[CuBr<sub>2</sub>]<sub>∞</sub>: theoretical (red) and experimental (blue)**

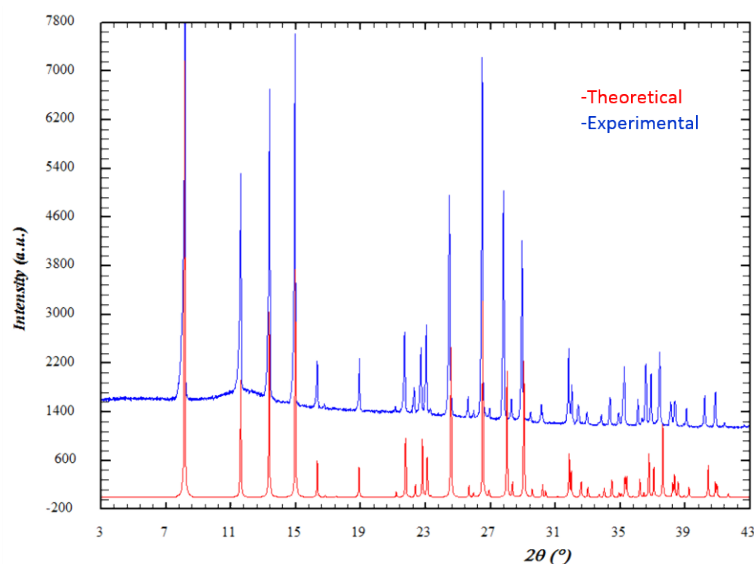

## B- Single crystal X-ray diffraction analysis for (MQ)[CuBr<sub>2</sub>]<sub>∞</sub> and (MQ)[BF<sub>4</sub>]

### B-I- (MQ)[CuBr<sub>2</sub>]<sub>∞</sub>

#### Summary of crystallographic data

|                                   |                                                                                                                         |
|-----------------------------------|-------------------------------------------------------------------------------------------------------------------------|
| Empirical formula                 | C9 H9 Br2 Cu N2                                                                                                         |
| Formula weight                    | 368.54                                                                                                                  |
| Temperature                       | 293(2) K                                                                                                                |
| wavelength                        | 0.71073 Å                                                                                                               |
| Crystal system, space group       | Monoclinic, C 2/m                                                                                                       |
| Unit cell dimensions              | a = 15.373(2) Å    alpha = 90 deg.<br>b = 6.4099(7) Å    beta = 96.692(12) deg.<br>c = 10.9646(18) Å    gamma = 90 deg. |
| Volume                            | 1073.1(3) Å <sup>3</sup>                                                                                                |
| Z, calculated density             | 4, 2.281 Mg/m <sup>3</sup>                                                                                              |
| Absorption coefficient            | 9.441 mm <sup>-1</sup>                                                                                                  |
| F(000)                            | 704                                                                                                                     |
| Crystal size                      | 0.362 x 0.185 x 0.081 mm                                                                                                |
| Theta range for data collection   | 3.447 to 27.308 deg.                                                                                                    |
| Limiting indices                  | -19<=h<=19, -8<=k<=7, -11<=l<=14                                                                                        |
| Reflections collected / unique    | 2530 / 1265 [R(int) = 0.0216]                                                                                           |
| Completeness to theta = 25.242    | 94.9 %                                                                                                                  |
| Absorption correction             | Integration                                                                                                             |
| Max. and min. transmission        | 0.4145 and 0.1832                                                                                                       |
| Refinement method                 | Full-matrix least-squares on F <sup>2</sup>                                                                             |
| Data / restraints / parameters    | 1265 / 0 / 92                                                                                                           |
| Goodness-of-fit on F <sup>2</sup> | 1.322                                                                                                                   |
| Final R indices [I>2sigma(I)]     | R1 = 0.0290, wR2 = 0.0792                                                                                               |
| R indices (all data)              | R1 = 0.0328, wR2 = 0.0912                                                                                               |
| Extinction coefficient            | 0.012(2)                                                                                                                |
| Largest diff. peak and hole       | 0.390 and -0.582 e.Å <sup>-3</sup>                                                                                      |

Table 2. Atomic coordinates ( $\times 10^4$ ) and equivalent isotropic displacement parameters ( $\text{\AA}^2 \times 10^3$ ).  
 $U(\text{eq})$  is defined as one third of the trace of the orthogonalized  $U_{ij}$  tensor.

|       | x       | y       | z        | $U(\text{eq})$ |
|-------|---------|---------|----------|----------------|
| C(1)  | 7633(4) | 5000    | 8930(5)  | 59(1)          |
| C(2)  | 7516(3) | 5000    | 6666(4)  | 46(1)          |
| C(3)  | 8428(3) | 5000    | 6711(5)  | 54(1)          |
| C(4)  | 8783(4) | 5000    | 5629(6)  | 64(1)          |
| C(5)  | 8264(4) | 5000    | 4487(6)  | 67(1)          |
| C(6)  | 7373(4) | 5000    | 4436(5)  | 61(1)          |
| C(7)  | 6979(3) | 5000    | 5528(5)  | 53(1)          |
| C(8)  | 5741(3) | 5000    | 6494(6)  | 62(1)          |
| C(9)  | 6240(3) | 5000    | 7645(5)  | 56(1)          |
| N(1)  | 7100(2) | 5000    | 7716(4)  | 49(1)          |
| N(2)  | 6083(3) | 5000    | 5466(5)  | 63(1)          |
| Cu(1) | 10000   | 7336(1) | 10000    | 66(1)          |
| Br(2) | 9281(1) | 5000    | 11400(1) | 54(1)          |
| Br(1) | 9046(1) | 10000   | 8769(1)  | 52(1)          |

Table 3. Bond lengths [Å] and angles [deg].

|                  |            |
|------------------|------------|
| C(1)-N(1)        | 1.480(6)   |
| C(1)-H(1B)       | 1.10(5)    |
| C(1)-H(1C)       | 0.77(8)    |
| C(2)-N(1)        | 1.381(6)   |
| C(2)-C(3)        | 1.397(6)   |
| C(2)-C(7)        | 1.414(7)   |
| C(3)-C(4)        | 1.362(8)   |
| C(3)-H(3)        | 0.9300     |
| C(4)-C(5)        | 1.405(9)   |
| C(4)-H(4)        | 0.9300     |
| C(5)-C(6)        | 1.364(9)   |
| C(5)-H(5)        | 0.9300     |
| C(6)-C(7)        | 1.403(8)   |
| C(6)-H(6)        | 0.9300     |
| C(7)-N(2)        | 1.372(6)   |
| C(8)-N(2)        | 1.298(8)   |
| C(8)-C(9)        | 1.398(8)   |
| C(8)-H(8)        | 0.9300     |
| C(9)-N(1)        | 1.315(6)   |
| C(9)-H(9)        | 0.9300     |
| Cu(1)-Br(2)#1    | 2.4935(6)  |
| Cu(1)-Br(2)      | 2.4935(6)  |
| Cu(1)-Br(1)#2    | 2.5347(6)  |
| Cu(1)-Br(1)      | 2.5347(6)  |
| Cu(1)-Cu(1)#1    | 2.9946(15) |
| Br(2)-Cu(1)#1    | 2.4934(6)  |
| Br(1)-Cu(1)#2    | 2.5347(6)  |
|                  |            |
| N(1)-C(1)-H(1B)  | 110(3)     |
| N(1)-C(1)-H(1C)  | 108(5)     |
| H(1B)-C(1)-H(1C) | 109(3)     |
| N(1)-C(2)-C(3)   | 122.1(4)   |
| N(1)-C(2)-C(7)   | 117.1(4)   |
| C(3)-C(2)-C(7)   | 120.8(5)   |
| C(4)-C(3)-C(2)   | 118.1(5)   |
| C(4)-C(3)-H(3)   | 120.9      |
| C(2)-C(3)-H(3)   | 120.9      |
| C(3)-C(4)-C(5)   | 122.2(5)   |
| C(3)-C(4)-H(4)   | 118.9      |
| C(5)-C(4)-H(4)   | 118.9      |
| C(6)-C(5)-C(4)   | 120.0(5)   |
| C(6)-C(5)-H(5)   | 120.0      |
| C(4)-C(5)-H(5)   | 120.0      |
| C(5)-C(6)-C(7)   | 119.7(5)   |

|                       |             |
|-----------------------|-------------|
| C(5)-C(6)-H(6)        | 120.1       |
| C(7)-C(6)-H(6)        | 120.1       |
| N(2)-C(7)-C(6)        | 119.2(5)    |
| N(2)-C(7)-C(2)        | 121.6(5)    |
| C(6)-C(7)-C(2)        | 119.2(5)    |
| N(2)-C(8)-C(9)        | 123.3(5)    |
| N(2)-C(8)-H(8)        | 118.3       |
| C(9)-C(8)-H(8)        | 118.3       |
| N(1)-C(9)-C(8)        | 119.6(5)    |
| N(1)-C(9)-H(9)        | 120.2       |
| C(8)-C(9)-H(9)        | 120.2       |
| C(9)-N(1)-C(2)        | 120.7(4)    |
| C(9)-N(1)-C(1)        | 120.1(5)    |
| C(2)-N(1)-C(1)        | 119.2(4)    |
| C(8)-N(2)-C(7)        | 117.5(5)    |
| Br(2)#1-Cu(1)-Br(2)   | 106.19(3)   |
| Br(2)#1-Cu(1)-Br(1)#2 | 117.514(17) |
| Br(2)-Cu(1)-Br(1)#2   | 110.314(17) |
| Br(2)#1-Cu(1)-Br(1)   | 110.314(17) |
| Br(2)-Cu(1)-Br(1)     | 117.513(16) |
| Br(1)#2-Cu(1)-Br(1)   | 95.29(3)    |
| Br(2)#1-Cu(1)-Cu(1)#1 | 53.094(15)  |
| Br(2)-Cu(1)-Cu(1)#1   | 53.094(16)  |
| Br(1)#2-Cu(1)-Cu(1)#1 | 132.354(15) |
| Br(1)-Cu(1)-Cu(1)#1   | 132.354(15) |
| Cu(1)#1-Br(2)-Cu(1)   | 73.81(3)    |
| Cu(1)-Br(1)-Cu(1)#2   | 84.71(3)    |

Symmetry transformations used to generate equivalent atoms:  
 #1 -x+2,-y+1,-z+2    #2 -x+2,-y+2,-z+2

Table 4. Anisotropic displacement parameters ( $\text{\AA}^2 \times 10^3$ ).  
 The anisotropic displacement factor exponent takes the form:  
 $-2 \pi^2 [ h^2 a^{*2} U_{11} + \dots + 2 h k a^* b^* U_{12} ]$

|       | U11   | U22   | U33   | U23 | U13   | U12 |
|-------|-------|-------|-------|-----|-------|-----|
| C(1)  | 58(3) | 79(4) | 41(2) | 0   | 5(2)  | 0   |
| C(2)  | 51(2) | 43(2) | 46(2) | 0   | 8(2)  | 0   |
| C(3)  | 48(2) | 59(3) | 55(3) | 0   | 7(2)  | 0   |
| C(4)  | 58(3) | 61(3) | 78(4) | 0   | 23(3) | 0   |
| C(5)  | 96(4) | 56(3) | 55(3) | 0   | 31(3) | 0   |
| C(6)  | 87(4) | 48(2) | 46(2) | 0   | 5(2)  | 0   |
| C(7)  | 55(2) | 45(2) | 57(3) | 0   | 1(2)  | 0   |
| C(8)  | 44(2) | 70(3) | 71(3) | 0   | 4(2)  | 0   |
| C(9)  | 48(2) | 57(3) | 65(3) | 0   | 13(2) | 0   |
| N(1)  | 47(2) | 46(2) | 53(2) | 0   | 6(2)  | 0   |
| N(2)  | 55(2) | 62(2) | 70(3) | 0   | -7(2) | 0   |
| Cu(1) | 68(1) | 65(1) | 65(1) | 0   | 13(1) | 0   |
| Br(2) | 58(1) | 55(1) | 50(1) | 0   | 13(1) | 0   |
| Br(1) | 48(1) | 57(1) | 50(1) | 0   | 3(1)  | 0   |

# checkCIF/PLATON report (basic structural check)

No syntax errors found.

Please wait while processing ....

[CIF dictionary](#)

[Interpreting this report](#)

## Datablock: shelx

---

|                    |                                                        |                    |
|--------------------|--------------------------------------------------------|--------------------|
| Bond precision:    | C-C = 0.0080 A                                         | Wavelength=0.71073 |
| Cell:              | a=15.373 (2)    b=6.4099 (7)    c=10.9646 (18)         |                    |
|                    | alpha=90        beta=96.692 (12)    gamma=90           |                    |
| Temperature:       | 293 K                                                  |                    |
|                    | Calculated                                             | Reported           |
| Volume             | 1073.1 (3)                                             | 1073.1 (3)         |
| Space group        | C 2/m                                                  | C 2/m              |
| Hall group         | -C 2y                                                  | -C 2y              |
| Moiety formula     | Br2 Cu, C9 H9 N2                                       | Br2 Cu, C9 H9 N2   |
| Sum formula        | C9 H9 Br2 Cu N2                                        | C9 H9 Br2 Cu N2    |
| Mr                 | 368.53                                                 | 368.54             |
| Dx, g cm-3         | 2.281                                                  | 2.281              |
| Z                  | 4                                                      | 4                  |
| Mu (mm-1)          | 9.441                                                  | 9.441              |
| F000               | 704.0                                                  | 704.0              |
| F000'              | 703.38                                                 |                    |
| h, k, lmax         | 19, 8, 14                                              | 19, 8, 14          |
| Nref               | 1325                                                   | 1265               |
| Tmin, Tmax         | 0.134, 0.465                                           | 0.183, 0.414       |
| Tmin'              | 0.030                                                  |                    |
| Correction method= | # Reported T Limits: Tmin=0.183                        |                    |
| Tmax=0.414         | AbsCorr = INTEGRATION                                  |                    |
| Data completeness= | 0.955        Theta(max)= 27.308                        |                    |
| R(reflections)=    | 0.0290 ( 1133)        wR2(reflections)= 0.0912 ( 1265) |                    |
| S = 1.322          | Npar= 92                                               |                    |

---

The following ALERTS were generated. Each ALERT has the format

**test-name\_ALERT\_alert-type\_alert-level.**

Click on the hyperlinks for more details of the test.

---

### .Alert level C

[PLAT019\\_ALERT\\_1\\_C](#) \_diffrn\_measured\_fraction\_theta\_full/\_max < 1.0

0.994 Report

[PLAT341\\_ALERT\\_3\\_C](#) Low Bond Precision on C-C Bonds ..... 0.0080  
Ang.

[PLAT350\\_ALERT\\_3\\_C](#) Short C-H (X0.96,N1.08A) C1 - H1C ... 0.76  
Ang.

---

### .Alert level G

[PLAT004\\_ALERT\\_5\\_G](#) Polymeric Structure Found with Maximum Dimension

1 Info

[PLAT164\\_ALERT\\_4\\_G](#) Nr. of Refined C-H H-Atoms in Heavy-Atom Struct. 2  
Note

[PLAT199\\_ALERT\\_1\\_G](#) Reported \_cell\_measurement\_temperature ..... (K)  
293 Check

[PLAT200\\_ALERT\\_1\\_G](#) Reported \_diffrn\_ambient\_temperature ..... (K) 293  
Check

[PLAT232\\_ALERT\\_2\\_G](#) Hirshfeld Test Diff (M-X) Br1 -- Cu1 .. 34.6 su

[PLAT232\\_ALERT\\_2\\_G](#) Hirshfeld Test Diff (M-X) Br2 -- Cu1 .. 25.4 su

[PLAT380\\_ALERT\\_4\\_G](#) Incorrectly? Oriented X(sp2)-Methyl Moiety ..... C1  
Check

[PLAT764\\_ALERT\\_4\\_G](#) Overcomplete CIF Bond List Detected (Rep/Expd) .  
1.19 Ratio

---

0 **ALERT level A** = Most likely a serious problem - resolve or explain

0 **ALERT level B** = A potentially serious problem, consider carefully

3 **ALERT level C** = Check. Ensure it is not caused by an omission or oversight

**8 ALERT level G** = General information/check it is not something unexpected

**B-II- (MO)/BF<sub>4</sub>]****Summary of crystallographic data**

|                                   |                                                                                                                          |
|-----------------------------------|--------------------------------------------------------------------------------------------------------------------------|
| Empirical formula                 | C <sub>9</sub> H <sub>9</sub> B F <sub>4</sub> N <sub>2</sub>                                                            |
| Formula weight                    | 231.99                                                                                                                   |
| Temperature                       | 293(2) K                                                                                                                 |
| wavelength                        | 0.71073 Å                                                                                                                |
| Crystal system, space group       | Monoclinic, P 2 <sub>1</sub> /a                                                                                          |
| Unit cell dimensions              | a = 13.372(2) Å    alpha = 90 deg.<br>b = 6.2221(9) Å    beta = 112.232(11) deg.<br>c = 13.8278(19) Å    gamma = 90 deg. |
| Volume                            | 1064.9(3) Å <sup>3</sup>                                                                                                 |
| Z, calculated density             | 4, 1.447 Mg/m <sup>3</sup>                                                                                               |
| Absorption coefficient            | 0.136 mm <sup>-1</sup>                                                                                                   |
| F(000)                            | 472                                                                                                                      |
| Crystal size                      | 0.204 x 0.176 x 0.102 mm                                                                                                 |
| Theta range for data collection   | 3.066 to 27.398 deg.                                                                                                     |
| Limiting indices                  | -17<=h<=17, -7<=k<=8, -17<=l<=14                                                                                         |
| Reflections collected / unique    | 4693 / 2357 [R(int) = 0.0315]                                                                                            |
| Completeness to theta = 25.242    | 98.5 %                                                                                                                   |
| Absorption correction             | None                                                                                                                     |
| Refinement method                 | Full-matrix least-squares on F <sup>2</sup>                                                                              |
| Data / restraints / parameters    | 2357 / 0 / 191                                                                                                           |
| Goodness-of-fit on F <sup>2</sup> | 0.716                                                                                                                    |
| Final R indices [I>2sigma(I)]     | R1 = 0.0362, wR2 = 0.0764                                                                                                |
| R indices (all data)              | R1 = 0.1415, wR2 = 0.0992                                                                                                |
| Extinction coefficient            | 0.028(4)                                                                                                                 |
| Largest diff. peak and hole       | 0.082 and -0.074 e.Å <sup>-3</sup>                                                                                       |



Table 2. Atomic coordinates ( $\times 10^4$ ) and equivalent isotropic displacement parameters ( $\text{\AA}^2 \times 10^3$ ).  
 $U(\text{eq})$  is defined as one third of the trace of the orthogonalized  $U_{ij}$  tensor.

|       | x        | y        | z        | $U(\text{eq})$ |
|-------|----------|----------|----------|----------------|
| C(1)  | 4436(2)  | 859(5)   | 850(2)   | 138(1)         |
| C(2)  | 5109(2)  | 1408(4)  | 2769(2)  | 86(1)          |
| C(3)  | 5727(2)  | -443(4)  | 2935(3)  | 117(1)         |
| C(4)  | 6337(2)  | -1021(5) | 3935(4)  | 141(1)         |
| C(5)  | 6356(2)  | 184(6)   | 4765(3)  | 133(1)         |
| C(6)  | 5767(2)  | 1985(5)  | 4621(2)  | 117(1)         |
| C(7)  | 5113(2)  | 2642(4)  | 3608(2)  | 90(1)          |
| C(8)  | 3923(2)  | 4979(4)  | 2523(3)  | 119(1)         |
| C(9)  | 3894(2)  | 3816(5)  | 1652(2)  | 107(1)         |
| N(1)  | 4475(2)  | 2075(4)  | 1782(2)  | 95(1)          |
| N(2)  | 4508(2)  | 4450(3)  | 3476(2)  | 114(1)         |
| F(1A) | 5868(4)  | 5765(10) | 1375(4)  | 132(2)         |
| F(1B) | 6040(30) | 5110(70) | 1760(50) | 264(12)        |
| F(2A) | 7269(17) | 4510(30) | 2513(7)  | 263(5)         |
| F(2B) | 7750(9)  | 4962(11) | 2483(7)  | 138(4)         |
| F(3A) | 7261(10) | 6550(20) | 1372(16) | 274(6)         |
| F(3B) | 7345(3)  | 6009(14) | 1001(6)  | 152(3)         |
| F(4A) | 6742(6)  | 3290(20) | 882(10)  | 166(4)         |
| F(4B) | 6773(10) | 2716(18) | 1440(30) | 157(7)         |
| B(1)  | 6847(2)  | 4896(5)  | 1564(3)  | 83(1)          |

Table 3. Bond lengths [ $\text{\AA}$ ] and angles [deg].

|                 |           |
|-----------------|-----------|
| C(1)-N(1)       | 1.478(3)  |
| C(1)-H(1A)      | 0.9600    |
| C(1)-H(1B)      | 0.9600    |
| C(1)-H(1C)      | 0.9600    |
| C(2)-N(1)       | 1.370(3)  |
| C(2)-C(3)       | 1.385(3)  |
| C(2)-C(7)       | 1.390(3)  |
| C(3)-C(4)       | 1.361(4)  |
| C(3)-H(3)       | 0.9300    |
| C(4)-C(5)       | 1.363(4)  |
| C(4)-H(4)       | 0.9300    |
| C(5)-C(6)       | 1.341(4)  |
| C(5)-H(5)       | 0.9300    |
| C(6)-C(7)       | 1.402(3)  |
| C(6)-H(6)       | 0.9300    |
| C(7)-N(2)       | 1.357(3)  |
| C(8)-N(2)       | 1.295(3)  |
| C(8)-C(9)       | 1.392(4)  |
| C(8)-H(8)       | 0.9300    |
| C(9)-N(1)       | 1.305(3)  |
| C(9)-H(9)       | 0.9300    |
| F(1A)-F(1B)     | 0.64(7)   |
| F(1A)-B(1)      | 1.348(5)  |
| F(1B)-B(1)      | 1.220(15) |
| F(1B)-F(2A)     | 1.62(6)   |
| F(2A)-F(2B)     | 0.719(17) |
| F(2A)-B(1)      | 1.240(9)  |
| F(2A)-F(4B)     | 1.77(3)   |
| F(2B)-B(1)      | 1.383(9)  |
| F(2B)-F(3A)     | 1.732(18) |
| F(3A)-F(3B)     | 0.659(19) |
| F(3A)-B(1)      | 1.244(11) |
| F(3B)-B(1)      | 1.387(6)  |
| F(4A)-F(4B)     | 0.838(17) |
| F(4A)-B(1)      | 1.344(7)  |
| F(4B)-B(1)      | 1.366(12) |
| N(1)-C(1)-H(1A) | 109.5     |

|                   |           |
|-------------------|-----------|
| N(1)-C(1)-H(1B)   | 109.5     |
| H(1A)-C(1)-H(1B)  | 109.5     |
| N(1)-C(1)-H(1C)   | 109.5     |
| H(1A)-C(1)-H(1C)  | 109.5     |
| H(1B)-C(1)-H(1C)  | 109.5     |
| N(1)-C(2)-C(3)    | 121.5(3)  |
| N(1)-C(2)-C(7)    | 118.0(2)  |
| C(3)-C(2)-C(7)    | 120.5(3)  |
| C(4)-C(3)-C(2)    | 118.6(3)  |
| C(4)-C(3)-H(3)    | 120.7     |
| C(2)-C(3)-H(3)    | 120.7     |
| C(3)-C(4)-C(5)    | 121.6(3)  |
| C(3)-C(4)-H(4)    | 119.2     |
| C(5)-C(4)-H(4)    | 119.2     |
| C(6)-C(5)-C(4)    | 120.8(3)  |
| C(6)-C(5)-H(5)    | 119.6     |
| C(4)-C(5)-H(5)    | 119.6     |
| C(5)-C(6)-C(7)    | 120.1(3)  |
| C(5)-C(6)-H(6)    | 120.0     |
| C(7)-C(6)-H(6)    | 120.0     |
| N(2)-C(7)-C(2)    | 122.1(2)  |
| N(2)-C(7)-C(6)    | 119.4(3)  |
| C(2)-C(7)-C(6)    | 118.5(3)  |
| N(2)-C(8)-C(9)    | 123.8(3)  |
| N(2)-C(8)-H(8)    | 118.1     |
| C(9)-C(8)-H(8)    | 118.1     |
| N(1)-C(9)-C(8)    | 119.4(3)  |
| N(1)-C(9)-H(9)    | 120.3     |
| C(8)-C(9)-H(9)    | 120.3     |
| C(9)-N(1)-C(2)    | 120.1(2)  |
| C(9)-N(1)-C(1)    | 118.8(3)  |
| C(2)-N(1)-C(1)    | 121.2(2)  |
| C(8)-N(2)-C(7)    | 116.6(2)  |
| F(1B)-F(1A)-B(1)  | 64.6(17)  |
| F(1A)-F(1B)-B(1)  | 87(4)     |
| F(1A)-F(1B)-F(2A) | 129(2)    |
| B(1)-F(1B)-F(2A)  | 49.3(18)  |
| F(2B)-F(2A)-B(1)  | 85.4(15)  |
| F(2B)-F(2A)-F(1B) | 126(2)    |
| B(1)-F(2A)-F(1B)  | 48.2(18)  |
| F(2B)-F(2A)-F(4B) | 105.1(14) |
| B(1)-F(2A)-F(4B)  | 50.3(9)   |
| F(1B)-F(2A)-F(4B) | 69.1(11)  |
| F(2A)-F(2B)-B(1)  | 63.4(11)  |
| F(2A)-F(2B)-F(3A) | 103.4(15) |
| B(1)-F(2B)-F(3A)  | 45.4(4)   |
| F(3B)-F(3A)-B(1)  | 87.9(14)  |
| F(3B)-F(3A)-F(2B) | 106.3(19) |
| B(1)-F(3A)-F(2B)  | 52.3(7)   |
| F(3A)-F(3B)-B(1)  | 63.7(12)  |
| F(4B)-F(4A)-B(1)  | 73.4(13)  |
| F(4A)-F(4B)-B(1)  | 70.5(11)  |
| F(4A)-F(4B)-F(2A) | 112.1(17) |
| B(1)-F(4B)-F(2A)  | 44.3(8)   |
| F(1B)-B(1)-F(2A)  | 82(4)     |
| F(1B)-B(1)-F(3A)  | 117(2)    |
| F(2A)-B(1)-F(3A)  | 109.1(15) |
| F(1B)-B(1)-F(4A)  | 112.0(11) |
| F(2A)-B(1)-F(4A)  | 118.8(10) |
| F(3A)-B(1)-F(4A)  | 113.7(13) |
| F(1B)-B(1)-F(1A)  | 28(3)     |
| F(2A)-B(1)-F(1A)  | 107.6(8)  |
| F(3A)-B(1)-F(1A)  | 96.0(9)   |
| F(4A)-B(1)-F(1A)  | 109.0(4)  |
| F(1B)-B(1)-F(4B)  | 96.2(18)  |
| F(2A)-B(1)-F(4B)  | 85.4(16)  |
| F(3A)-B(1)-F(4B)  | 144.3(14) |
| F(4A)-B(1)-F(4B)  | 36.0(8)   |
| F(1A)-B(1)-F(4B)  | 110.8(6)  |
| F(1B)-B(1)-F(2B)  | 109(3)    |
| F(2A)-B(1)-F(2B)  | 31.2(8)   |
| F(3A)-B(1)-F(2B)  | 82.3(8)   |
| F(4A)-B(1)-F(2B)  | 119.4(6)  |
| F(1A)-B(1)-F(2B)  | 127.7(5)  |
| F(4B)-B(1)-F(2B)  | 98.1(11)  |

|                  |           |
|------------------|-----------|
| F(1B)-B(1)-F(3B) | 137(3)    |
| F(2A)-B(1)-F(3B) | 124.7(13) |
| F(3A)-B(1)-F(3B) | 28.4(9)   |
| F(4A)-B(1)-F(3B) | 85.5(9)   |
| F(1A)-B(1)-F(3B) | 109.2(4)  |
| F(4B)-B(1)-F(3B) | 117.0(12) |
| F(2B)-B(1)-F(3B) | 93.6(6)   |

Symmetry transformations used to generate equivalent atoms:

Table 4. Anisotropic displacement parameters ( $\text{\AA}^2 \times 10^3$ ) for shelx. The anisotropic displacement factor exponent takes the form:  $-2 \pi^2 [ h^2 a^{*2} U_{11} + \dots + 2 h k a^* b^* U_{12} ]$

|       | U11     | U22     | U33     | U23      | U13     | U12      |
|-------|---------|---------|---------|----------|---------|----------|
| C(1)  | 139(2)  | 189(3)  | 98(2)   | -52(2)   | 60(2)   | -35(2)   |
| C(2)  | 74(1)   | 95(2)   | 88(2)   | -16(2)   | 31(1)   | -9(1)    |
| C(3)  | 96(2)   | 115(2)  | 136(3)  | -29(2)   | 40(2)   | 3(2)     |
| C(4)  | 107(2)  | 111(2)  | 183(4)  | -13(3)   | 31(2)   | 10(2)    |
| C(5)  | 109(2)  | 124(2)  | 134(3)  | 16(2)    | 10(2)   | -4(2)    |
| C(6)  | 112(2)  | 131(2)  | 97(2)   | -19(2)   | 28(2)   | -19(2)   |
| C(7)  | 90(1)   | 91(2)   | 88(2)   | -16(2)   | 31(1)   | -8(1)    |
| C(8)  | 108(2)  | 106(2)  | 134(3)  | -7(2)    | 35(2)   | 8(2)     |
| C(9)  | 96(2)   | 124(2)  | 94(2)   | 5(2)     | 28(2)   | -16(2)   |
| N(1)  | 87(1)   | 109(2)  | 97(2)   | -18(1)   | 43(1)   | -22(1)   |
| N(2)  | 120(2)  | 105(2)  | 110(2)  | -23(1)   | 36(1)   | 6(1)     |
| F(1A) | 110(2)  | 122(3)  | 174(6)  | -32(2)   | 66(3)   | 14(2)    |
| F(1B) | 174(14) | 173(15) | 530(30) | -80(20)  | 230(19) | -60(11)  |
| F(2A) | 191(10) | 469(17) | 115(4)  | 66(7)    | 41(5)   | 57(7)    |
| F(2B) | 122(5)  | 158(7)  | 112(5)  | -25(4)   | 19(3)   | -3(3)    |
| F(3A) | 374(15) | 240(8)  | 290(12) | -104(11) | 218(14) | -184(10) |
| F(3B) | 117(4)  | 227(6)  | 129(4)  | 18(4)    | 66(3)   | -5(3)    |
| F(4A) | 136(3)  | 176(7)  | 164(6)  | -80(4)   | 31(3)   | 30(4)    |
| F(4B) | 107(5)  | 103(5)  | 244(19) | -11(7)   | 46(9)   | -10(4)   |
| B(1)  | 75(2)   | 83(2)   | 97(3)   | -4(2)    | 37(2)   | -9(2)    |

# checkCIF/PLATON report (basic structural check)

No syntax errors found.  
Please wait while processing ....

CIF dictionary  
Interpreting this report

## Datablock: shelx

---

|                        |                                                |                                   |
|------------------------|------------------------------------------------|-----------------------------------|
| Bond precision:        | C-C = 0.0047 A                                 | Wavelength=0.71073                |
| Cell:                  | a=13.372 (2)    b=6.2221 (9)    c=13.8278 (19) |                                   |
|                        | alpha=90    beta=112.232 (11)    gamma=90      |                                   |
| Temperature:           | 293 K                                          |                                   |
|                        | Calculated                                     | Reported                          |
| Volume                 | 1065.0 (3)                                     | 1064.9 (3)                        |
| Space group            | P 21/a                                         | P 21/a                            |
| Hall group             | -P 2yab                                        | -P 2yab                           |
| Moiety formula         | C9 H9 N2, B F4                                 | C9 H9 N2, B F4                    |
| Sum formula            | C9 H9 B F4 N2                                  | C9 H9 B F4 N2                     |
| Mr                     | 231.99                                         | 231.99                            |
| Dx, g cm <sup>-3</sup> | 1.447                                          | 1.447                             |
| Z                      | 4                                              | 4                                 |
| Mu (mm <sup>-1</sup> ) | 0.136                                          | 0.136                             |
| F000                   | 472.0                                          | 472.0                             |
| F000'                  | 472.36                                         |                                   |
| h, k, lmax             | 17, 8, 17                                      | 17, 8, 17                         |
| Nref                   | 2419                                           | 2357                              |
| Tmin, Tmax             | 0.973, 0.986                                   |                                   |
| Tmin'                  | 0.973                                          |                                   |
| Correction method=     | Not given                                      |                                   |
| Data completeness=     | 0.974                                          | Theta (max)= 27.398               |
| R (reflections)=       | 0.0362 ( 707)                                  | wR2 (reflections)= 0.0992 ( 2357) |
| S =                    | 0.716                                          | Npar= 191                         |

---

The following ALERTS were generated. Each ALERT has the format  
**test-name\_ALERT\_alert-type\_alert-level**.  
Click on the hyperlinks for more details of the test.

### .Alert level B

[PLAT026\\_ALERT\\_3\\_B](#) Ratio Observed / Unique Reflections too Low .... 30  
%  
[PLAT242\\_ALERT\\_2\\_B](#) Low Ueq as Compared to Neighbors for ..... B1  
Check

### .Alert level C

[GOODF01\\_ALERT\\_2\\_C](#) The least squares goodness of fit parameter lies  
outside the range 0.80 <> 2.00  
Goodness of fit given = 0.716  
[PLAT234\\_ALERT\\_4\\_C](#) Large Hirshfeld Difference F3A -- B1 .. 0.23 Ang.  
[PLAT241\\_ALERT\\_2\\_C](#) High Ueq as Compared to Neighbors for ..... C4  
Check  
[PLAT340\\_ALERT\\_3\\_C](#) Low Bond Precision on C-C Bonds ..... 0.0047  
Ang.

### .Alert level G

[PLAT128\\_ALERT\\_4\\_G](#) Alternate Setting for Input Space Group P21/a P21/c  
Note  
[PLAT199\\_ALERT\\_1\\_G](#) Reported \_cell\_measurement\_temperature ..... (K)  
293 Check  
[PLAT200\\_ALERT\\_1\\_G](#) Reported \_diffrn\_ambient\_temperature ..... (K) 293  
Check  
[PLAT230\\_ALERT\\_2\\_G](#) Hirshfeld Test Diff for F3B -- B1 .. 6.2 su  
[PLAT301\\_ALERT\\_3\\_G](#) Main Residue Disorder ..... Percentage = 25  
Note  
[PLAT432\\_ALERT\\_2\\_G](#) Short Inter X...Y Contact F4A .. C9 .. 2.97 Ang.  
**And 2 other PLAT432 Alerts**

More ...

PLAT764\_ALERT\_4\_G Overcomplete CIF Bond List Detected (Rep/Expd) .

1.35 Ratio

PLAT779\_ALERT\_4\_G Suspect or Irrelevant (Bond) Angle in CIF .... # 55

Check

B1 -F4B -F2A 1.555 1.555 1.555 44.30 Deg.

PLAT779\_ALERT\_4\_G Suspect or Irrelevant (Bond) Angle in CIF .... # 62

Check

F1B -B1 -F1A 1.555 1.555 1.555 28.00 Deg.

PLAT779\_ALERT\_4\_G Suspect or Irrelevant (Bond) Angle in CIF .... # 69

Check

F4A -B1 -F4B 1.555 1.555 1.555 36.00 Deg.

PLAT779\_ALERT\_4\_G Suspect or Irrelevant (Bond) Angle in CIF .... # 72

Check

F2A -B1 -F2B 1.555 1.555 1.555 31.20 Deg.

PLAT779\_ALERT\_4\_G Suspect or Irrelevant (Bond) Angle in CIF .... # 79

Check

F3A -B1 -F3B 1.555 1.555 1.555 28.40 Deg.

---

0 **ALERT level A** = Most likely a serious problem - resolve or explain

2 **ALERT level B** = A potentially serious problem, consider carefully

4 **ALERT level C** = Check. Ensure it is not caused by an omission or oversight

14 **ALERT level G** = General information/check it is not something unexpected

## C-Supplementary Tables

**Table S1:** View of the  $[\text{CuBr}_2]_\infty$  chain with the corresponding selected Bond distances [ $\text{\AA}$ ] and Angles (deg.)

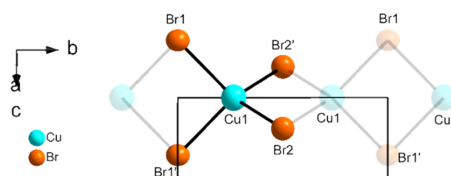

|                                      |                                                                                      |               |                                                       |
|--------------------------------------|--------------------------------------------------------------------------------------|---------------|-------------------------------------------------------|
| Bond Distances                       | $\text{Cu}_1\text{-Br}_1 = 2.535 (1)$                                                | <i>0.021</i>  | Deviation from ideal tetrahedral geometry (abs value) |
|                                      | $\text{Cu}_1\text{-Br}_2 = 2.493 (1)$                                                | <i>0.021</i>  |                                                       |
| Bridging Angles                      | $\text{Cu}_1\text{-Br}_1\text{-Cu}_1 = 84.708(3)$                                    | <i>14.178</i> |                                                       |
|                                      | $\text{Cu}_1\text{-Br}_2\text{-Cu}_1 = 73.810(3)$                                    | <i>3.280</i>  |                                                       |
| Interligand                          | $\text{Br}_1\text{Cu}_1\text{Br}_1'\text{-Br}_2\text{Cu}_1\text{Br}_2' = 84.426(10)$ | <i>5.574</i>  |                                                       |
| Dihedral Angles                      | $\text{Br}_1\text{Cu}_1\text{Br}_2'\text{-Br}_1'\text{Cu}_1\text{Br}_2 = 77.678(7)$  | <i>12.322</i> |                                                       |
|                                      | $\text{Br}_1\text{Cu}_1\text{Br}_2\text{-Br}_1'\text{Cu}_1\text{Br}_2' = 83.078(8)$  | <i>6.922</i>  |                                                       |
| Edge Central Angles                  | $\text{Br}_1\text{-Cu}_1\text{-Br}_1' = 95.292 (3)$                                  | <i>14.208</i> |                                                       |
|                                      | $\text{Br}_2\text{-Cu}_1\text{-Br}_2' = 106.190 (4)$                                 | <i>3.310</i>  |                                                       |
|                                      | $\text{Br}_1\text{-Cu}_1\text{-Br}_2' = 110.314 (4)$                                 | <i>0.814</i>  |                                                       |
|                                      | $\text{Br}_1\text{-Cu}_1\text{-Br}_2 = 117.513 (6)$                                  | <i>8.013</i>  |                                                       |
| Face-Edge-Face Angles <sup>(a)</sup> | $\text{Br}_1'( \text{Br}_2'\text{Br}_2)\text{Br}_1 = 60.372(10)$                     | <i>10.157</i> |                                                       |
|                                      | $\text{Br}_2(\text{Br}_1'\text{Br}_1)\text{Br}_2' = 63.529(9)$                       | <i>7.000</i>  |                                                       |
|                                      | $\text{Br}_1(\text{Br}_2\text{Br}_1')\text{Br}_2' = 70.362(10)$                      | <i>0.167</i>  |                                                       |
|                                      | $\text{Br}_1'( \text{Br}_2'\text{Br}_1)\text{Br}_2 = 70.369(9)$                      | <i>0.160</i>  |                                                       |
|                                      | $\text{Br}_1'( \text{Br}_2\text{Br}_1)\text{Br}_2' = 78.854(9)$                      | <i>8.325</i>  |                                                       |

a(bc)d: dihedral angle between the abc and bcd planes, (bc) being the common shared-edge

**Table S2:** Thermal ellipsoid view of the MQ moiety of  $(\text{MQ})[\text{CuBr}_2]_\infty$  with its corresponding selected Bond distances [ $\text{\AA}$ ] and Angles (deg.). Comparison with those measured in  $(\text{MQ})[\text{BF}_4]$  and reported in  $(\text{MQ})_2\{\text{H}_2\text{-}[\text{Fe}^{\text{II}}(\text{CN})_6]\}^7$

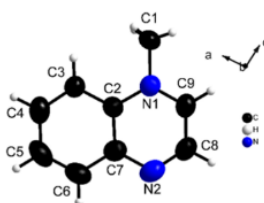

|                                                | $(\text{MQ})[\text{CuBr}_2]_\infty$ | $(\text{MQ})[\text{BF}_4] (\text{ESI}^\dagger)$ | $(\text{MQ})_2\{\text{H}_2\text{-}[\text{Fe}^{\text{II}}(\text{CN})_6]\}^7$ |
|------------------------------------------------|-------------------------------------|-------------------------------------------------|-----------------------------------------------------------------------------|
| Bond Distances                                 | $\text{C}_1\text{-N}_1 = 1.480 (6)$ | $1.478 (3)$                                     | $1.476 (7)$                                                                 |
|                                                | $\text{C}_9\text{-N}_1 = 1.315 (6)$ | $1.305 (3)$                                     | $1.364 (6)$                                                                 |
|                                                | $\text{C}_9\text{-C}_8 = 1.398 (8)$ | $1.392 (4)$                                     | $1.288 (8)$                                                                 |
|                                                | $\text{C}_8\text{-N}_2 = 1.298 (8)$ | $1.295 (3)$                                     | $1.331 (6)$                                                                 |
|                                                | $\text{C}_7\text{-N}_2 = 1.372 (6)$ | $1.357 (3)$                                     | $1.389 (5)$                                                                 |
|                                                | $\text{C}_7\text{-C}_2 = 1.414 (7)$ | $1.390 (3)$                                     | $1.355 (6)$                                                                 |
|                                                | $\text{C}_2\text{-C}_3 = 1.397 (6)$ | $1.385 (3)$                                     | $1.440 (6)$                                                                 |
|                                                | $\text{C}_3\text{-C}_4 = 1.362 (8)$ | $1.361 (4)$                                     | $1.342 (7)$                                                                 |
|                                                | $\text{C}_4\text{-C}_5 = 1.405 (9)$ | $1.363 (4)$                                     | $1.331 (8)$                                                                 |
|                                                | $\text{C}_5\text{-C}_6 = 1.364 (9)$ | $1.341 (4)$                                     | $1.388 (7)$                                                                 |
|                                                | $\text{C}_6\text{-C}_7 = 1.403 (8)$ | $1.402 (3)$                                     | $1.440 (6)$                                                                 |
|                                                | Planar angles                       | $\text{C}_1\text{-N}_1\text{-C}_2 = 119.2 (4)$  | $121.2 (3)$                                                                 |
| $\text{C}_9\text{-N}_1\text{-C}_2 = 120.7 (4)$ |                                     | $120.1 (2)$                                     | $115.0 (3)$                                                                 |
| $\text{N}_1\text{-C}_9\text{-C}_8 = 119.6 (5)$ |                                     | $119.4 (3)$                                     | $123.4 (4)$                                                                 |
| $\text{C}_9\text{-C}_8\text{-N}_2 = 123.3 (5)$ |                                     | $123.8 (3)$                                     | $125.2 (5)$                                                                 |
| $\text{C}_8\text{-N}_2\text{-C}_7 = 117.5 (5)$ |                                     | $116.6 (2)$                                     | $112.9 (3)$                                                                 |
| $\text{N}_2\text{-C}_7\text{-C}_2 = 121.6 (5)$ |                                     | $122.1 (2)$                                     | $124.0 (3)$                                                                 |
| $\text{C}_7\text{-C}_2\text{-N}_1 = 117.1 (4)$ |                                     | $118.0 (2)$                                     | $119.0 (3)$                                                                 |
| $\text{C}_7\text{-C}_2\text{-C}_3 = 120.8 (5)$ |                                     | $120.5 (3)$                                     | $119.2 (4)$                                                                 |
| $\text{C}_2\text{-C}_3\text{-C}_4 = 118.1 (5)$ |                                     | $118.6 (3)$                                     | $117.8 (4)$                                                                 |
| $\text{C}_3\text{-C}_4\text{-C}_5 = 122.2 (5)$ |                                     | $121.6 (3)$                                     | $123.7 (5)$                                                                 |
| $\text{C}_4\text{-C}_5\text{-C}_6 = 120.0 (5)$ |                                     | $120.8 (3)$                                     | $121.5 (5)$                                                                 |
| $\text{C}_5\text{-C}_6\text{-C}_7 = 119.7 (5)$ |                                     | $120.1 (3)$                                     | $116.2 (4)$                                                                 |

$$C_6-C_7-C_2 = 119.2 (5) \quad 118.5 (3) \quad 121.2 (3)$$

**Table S3:** Average Interplanar distances between two consecutive cations in some cationic  $\pi$ -deficient heterocycles with a similar stacking arrangement.

| Compound Formula <sup>a</sup>                                             | Temperature (K) | Interplanar distance [ $\text{\AA}$ ] <sup>(b)</sup> | Ref. |
|---------------------------------------------------------------------------|-----------------|------------------------------------------------------|------|
| (NMP) <sub>2</sub> [Pd(C <sub>2</sub> O <sub>4</sub> ) <sub>2</sub> ]     | 295             | 3.25 <sup>(c)</sup>                                  | 11a  |
| (NMP) <sub>2</sub> [Cu(mnt) <sub>2</sub> ]                                | 295             | 3.33                                                 | 11b  |
| (NMP) <sub>2</sub> [Pd(NO <sub>2</sub> ) <sub>4</sub> ]                   | 295             | 3.33                                                 | 11c  |
| (NMP)[Ni(S <sub>2</sub> C <sub>6</sub> H <sub>4</sub> ) <sub>2</sub> ]    | 295             | 3.36                                                 | 11d  |
| (NMP)[TCNQ]                                                               | 295             | 3.36                                                 | 11e  |
| (NMP)[Ni(mnt) <sub>2</sub> ]                                              | 295             | 3.38                                                 | 11f  |
| (NMP)[2,5-Cl <sub>2</sub> TCNQ]                                           | 296             | 3.42                                                 | 11g  |
| (NMP) <sub>2</sub> [Ni(mmt) <sub>2</sub> ]                                | 295             | 3.42                                                 | 11h  |
| (Q) <sub>4</sub> [Ge <sub>1</sub> Mo <sub>12</sub> O <sub>39</sub> OH]    | 295             | 3.42                                                 | 11i  |
| (Q) <sub>4</sub> [PMo <sub>9</sub> W <sub>3</sub> O <sub>40</sub> ·2DMF]  | 295             | 3.44                                                 | 11j  |
| (Q)[Co(Co) <sub>4</sub> ]                                                 | 295             | 3.46                                                 | 11k  |
| (MQ) <sub>2</sub> {H <sub>2</sub> -[Fe <sup>II</sup> (CN) <sub>6</sub> ]} | 295             | 3.47                                                 | 7    |
| (N-MeA) <sub>2</sub> [Ni(mnt) <sub>2</sub> ]                              | 291             | 3.52                                                 | 11l  |
| (N-MeA)[X], H <sub>2</sub> O (X=Cl <sup>-</sup> , Br <sup>-</sup> )       | 295             | 3.52 <sup>Cl</sup> , 3.54 <sup>Br</sup>              | 11m  |

(a) NMP=N-Methylphenazinium, Q=N-Methylquinolinium, MQ=N-methylquinoxalinium, N-MeA=N-Methylacridinium. (b) Average distance measured between two consecutive planes which contain only the phenazine or quinoxaline core. (c) Specific distance measured in a NMP/NMP/[Pb(C<sub>2</sub>O<sub>4</sub>)<sub>2</sub>] tryad

## D-Supplementary Figures

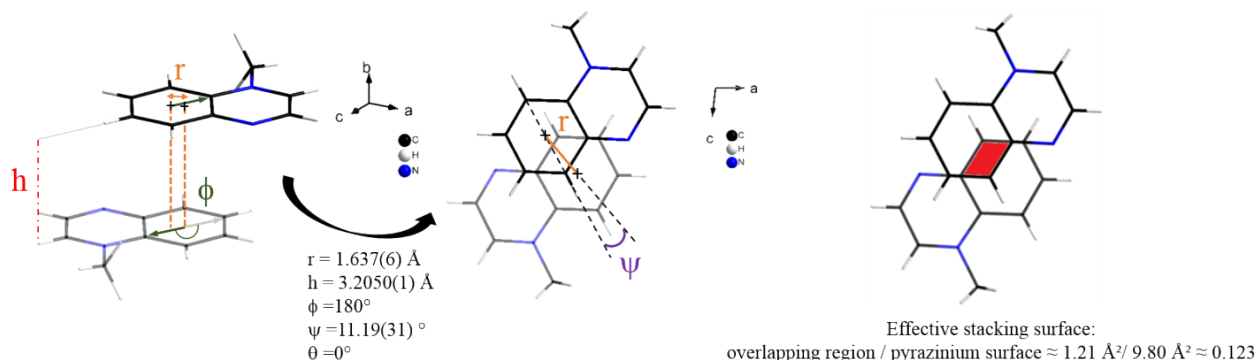

**Figure S1.** Stacking parameters within the organic sub-network of  $(\text{MQ})[\text{CuBr}_2]_\infty$ : Interplanar distance ( $h$ ), shift distance between the centres of the two phenyls ( $r$ ), inclination angle between two MQ moieties ( $\theta$ ), twist angle between two MQ ( $\phi$ ), direction of the shift  $r$  along the  $\text{N}^+\text{-CH}_3$  direction ( $\psi$ ). Calculated effective stacking surface (red) of about 12%.

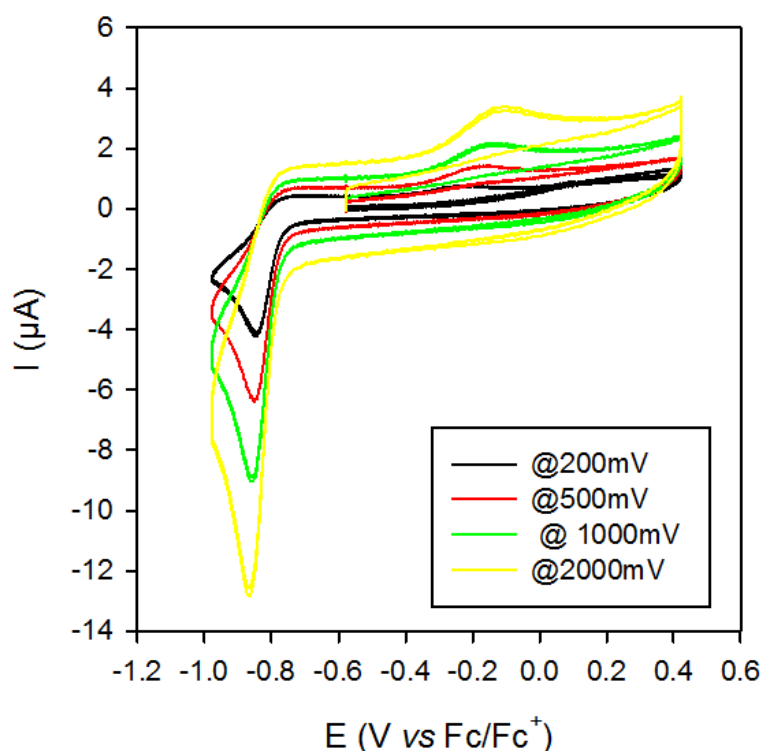

**Figure S2.** Cyclic Voltammogram of  $(\text{MQ})[\text{BF}_4]$  (0.65mM) in DMF, with TBAP (0.1 M) as supporting electrolyte on Pt, at different scan rates.



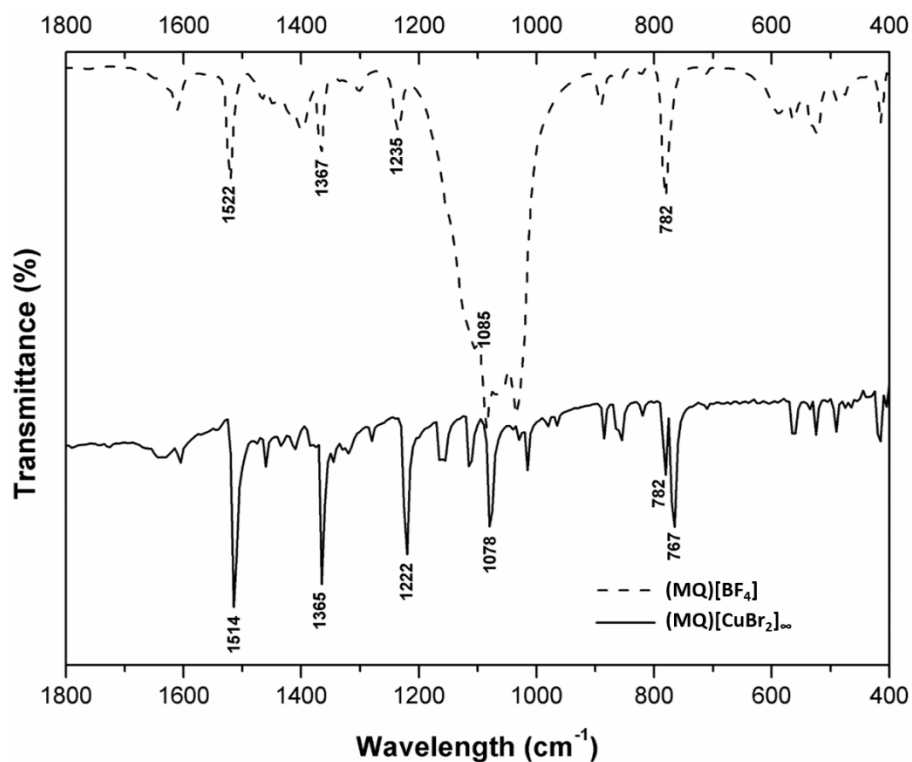

**Figure S3.** Infrared spectra (MQ)[CuBr<sub>2</sub>]<sub>∞</sub> (solid line) and (MQ)[BF<sub>4</sub>] (dashed line).

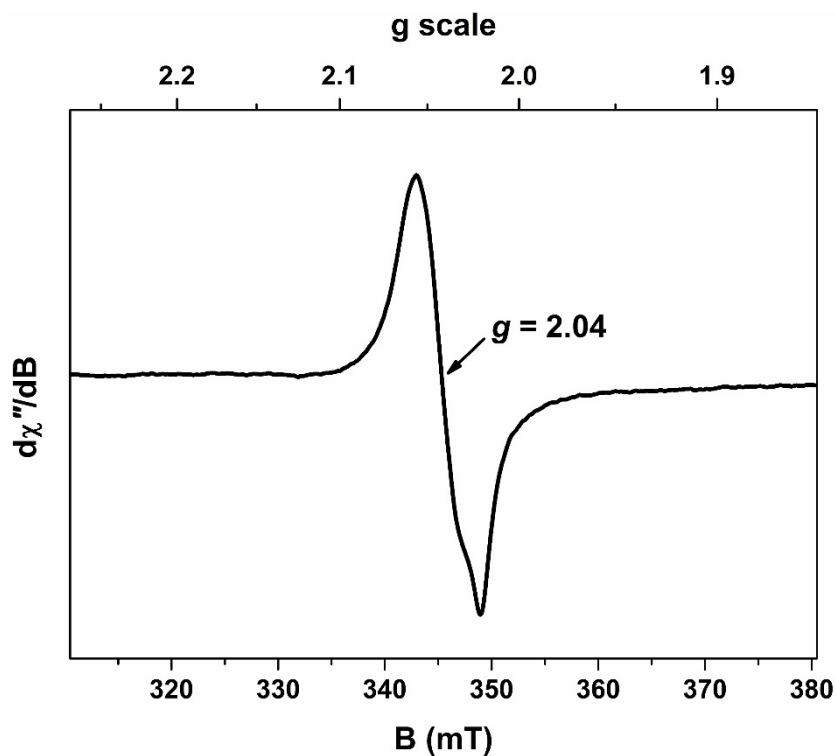

**Figure S4.** X-band EPR spectrum of polycrystalline (MQ)[CuBr<sub>2</sub>]<sub>∞</sub> recorded at ambient temperature (experimental conditions: frequency, 9.4471 GHz; power, 20.0 mW; modulation, 0.2 mT).

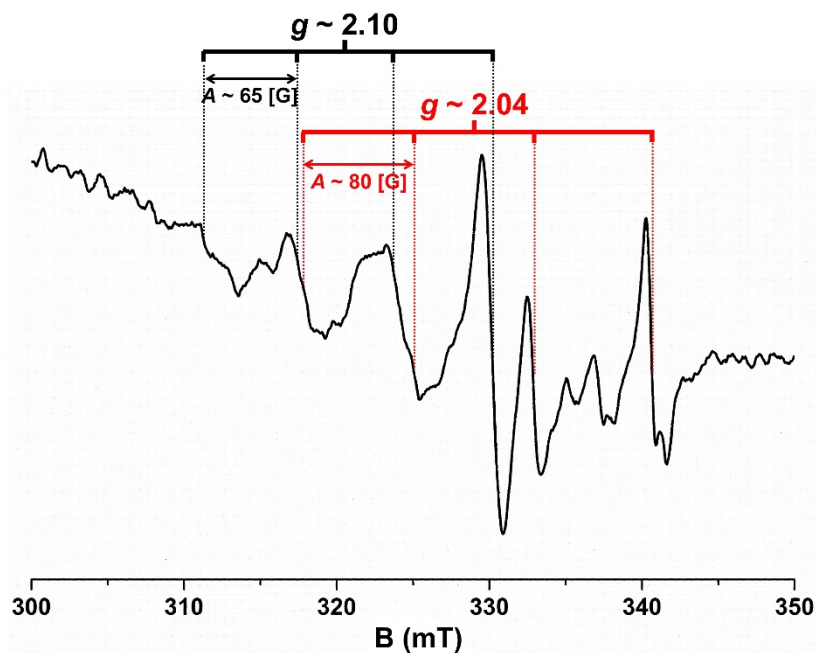

**Figure S5.** X-band EPR spectrum of (MQ)[CuBr<sub>2</sub>] recorded in DMSO solution at 333 K (experimental conditions: frequency, 9.4235 GHz; power, 50.3 mW; modulation, 0.6 mT). Two identifiable four-line Cu(II) signals are indicated above the spectrum.

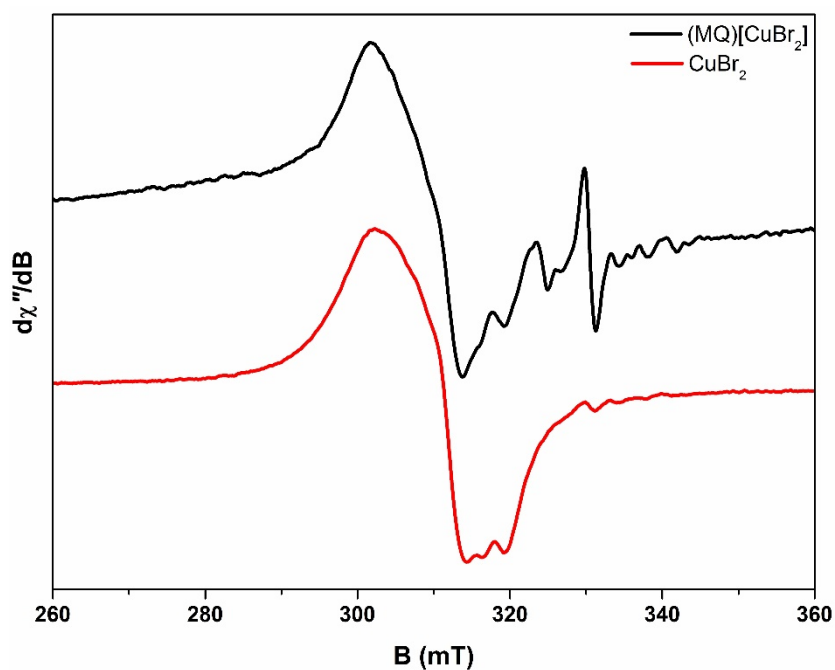

**Figure S6.** Comparison of the EPR spectra of ‘exposed’ (MQ)[CuBr<sub>2</sub>] (black) and CuBr<sub>2</sub> (red) in DMSO solution at 293 K (experimental conditions: frequency, 9.4248 GHz; power, 15.0 mW; modulation, 0.6 mT).

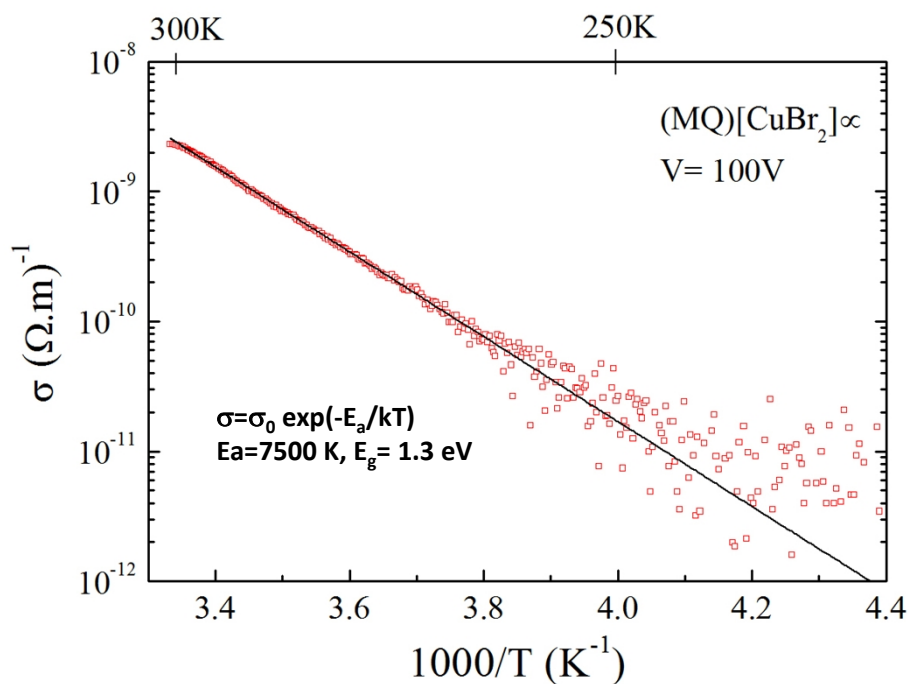

**Figure S7.** Conductivity of single crystal along the  $b$  axis of  $(\text{MQ})[\text{CuBr}_2]_\infty$  plotted as a function of the inverse temperature. The black line is the fit of the data with an activation law.

### **E-Further experimental techniques**

**Resistivity measurements.** Gold wires were attached with silver paint on the corresponding small faces of the plate-like single crystals. Because of very high resistance values, two-probe DC measurements were performed under vacuum, applying a constant voltage in the range 100 - 200V and measuring the current using a Keithley 6487 Picoammeter / Voltage Source. The temperature dependence of the resistivity has been measured in a Quantum Design PPMS.
